# Supplementary material
Source: PubMed Central journal article supplement (PMC6547142)

## Supplementary Online Content

Ecker BL, Vollmer CM Jr, Behrman SW, et al. Role of adjuvant multimodality therapy after curative-intent resection of ampullary carcinoma. *JAMA Surg*.

Published online May 29, 2019. doi:10.1001/jamasurg.2019.1170

**eTable 1.** Univariate Analysis of Operative Characteristics and Postoperative Outcomes of Pancreatoduodenectomy, Stratified by Disease Pathology (n=5082)

**eTable 2.** Demographic and Clinicopathologic Variables of the Propensity Score-Matched Cohort, and Univariate Comparison Between Patients Receiving Surgery Alone or Adjuvant Therapy (n=162)

**eFigure 1.** Association of Adjuvant therapy and Overall Survival in the Unmatched Cohort, Stratified by Pathologic Stage (stage I: n=86; stage II: n=21; stage III: n=211)

**eFigure 2.** Association of Adjuvant Chemoradiotherapy Relative to Surgery Alone (left; n=79) or Chemotherapy Alone (right; n=75) on Recurrence-Free Survival in the Propensity Score-Matched Cohort

This supplementary material has been provided by the authors to give readers additional information about their work.

**eTable 1.** Univariate Analysis of Operative Characteristics and Postoperative Outcomes of Pancreatoduodenectomy, Stratified by Disease Pathology (n=5082)

| Variable, N(%) or median (IQR) or mean (SD)                                                                                                                                                      | Ampullary adenocarcinoma (n=310) | All Other Pathologies (n=4,722) | P Value      |      |
|--------------------------------------------------------------------------------------------------------------------------------------------------------------------------------------------------|----------------------------------|---------------------------------|--------------|------|
| <i>Operative characteristics</i>                                                                                                                                                                 |                                  |                                 |              |      |
| Gland texture, soft                                                                                                                                                                              | 229 (73.9)                       | 2,499 (52.9)                    | <.001        |      |
| Main pancreatic duct (mm)                                                                                                                                                                        | 3.8 (2.2)                        | 3.9 (2.2)                       | .631         |      |
| Total FRS                                                                                                                                                                                        | 4.3 (1.9)                        | 3.6 (2.2)                       | <.001        |      |
| Prophylactic intraperitoneal drainage                                                                                                                                                            | 271 (87.4)                       | 4,085 (94.5)                    | <.001        |      |
| Prophylactic octreotide                                                                                                                                                                          | 160 (51.6)                       | 1,204 (35.2)                    | <.001        |      |
| PG reconstruction                                                                                                                                                                                | 15 (4.8)                         | 229 (4.8)                       | .821         |      |
| Biologic sealant                                                                                                                                                                                 | 22 (7.1)                         | 138 (3.1)                       | <.001        |      |
| <i>Postoperative outcomes</i>                                                                                                                                                                    |                                  |                                 |              |      |
| Complication                                                                                                                                                                                     | All (Accordion ≥1)               | 167 (57.8)                      | 2,605 (55.2) | .385 |
|                                                                                                                                                                                                  | Major (Accordion ≥3)             | 57 (19.7)                       | 891 (18.9)   | .719 |
| CR-POPF                                                                                                                                                                                          | 83 (26.8)                        | 557 (11.8)                      | <.001        |      |
| Percutaneous drainage                                                                                                                                                                            | 46 (15.6)                        | 213 (10.7)                      | .012         |      |
| Therapeutic antibiotic(s)                                                                                                                                                                        | 118 (40.0)                       | 786 (40.2)                      | .952         |      |
| Parenteral nutrition                                                                                                                                                                             | 78 (26.6)                        | 555 (28.8)                      | .441         |      |
| Hospital LOS, days                                                                                                                                                                               | 9 [7-15]                         | 8 [7-13]                        | .002         |      |
| Readmission, 90 days                                                                                                                                                                             | 44 (15.1)                        | 335 (15.2)                      | .938         |      |
| Abbreviations: IQR interquartile range; SD standard deviation; FRS fistula risk score; PG pancreatogastrostomy; CR-POPF clinically relevant postoperative pancreatic fistula; LOS length of stay |                                  |                                 |              |      |

**eTable 2.** Demographic and Clinicopathologic Variables of the Propensity Score-Matched Cohort, and Univariate Comparison Between Patients Receiving Surgery Alone or Adjuvant Therapy (n=162)

|                     |               | <b>Surgery Alone<br/>(%)<br/>n=81</b> | <b>Adjuvant Therapy<br/>(%)<br/>n=81</b> | <b>P Value</b> |
|---------------------|---------------|---------------------------------------|------------------------------------------|----------------|
| Age (years)         | <65           | 36 (44.4)                             | 34 (42.0)                                | .717           |
|                     | 65-75         | 20 (24.7)                             | 23 (28.4)                                |                |
|                     | >75           | 25 (30.9)                             | 23 (28.4)                                |                |
| Race                | White         | 66 (81.5)                             | 75 (92.6)                                | .146           |
|                     | Black         | 9 (11.1)                              | 3 (3.7)                                  |                |
|                     | Asian/Other   | 2 (2.5)                               | 2 (2.5)                                  |                |
| T classification    | T1-2          | 33 (40.7)                             | 33 (40.7)                                | .603           |
|                     | T3-4          | 48 (59.3)                             | 47 (58.0)                                |                |
| N classification    | Node-negative | 28 (34.6)                             | 30 (37.0)                                | .583           |
|                     | Node-positive | 52 (64.2)                             | 51 (63.0)                                |                |
| Perineural invasion | Absent        | 42 (51.9)                             | 36 (44.4)                                | .637           |
|                     | Present       | 38 (46.9)                             | 44 (54.3)                                |                |

**eFigure 1.** Association of Adjuvant therapy and Overall Survival in the Unmatched Cohort, Stratified by Pathologic Stage (stage I: n=86; stage II: n=21; stage III: n=211)

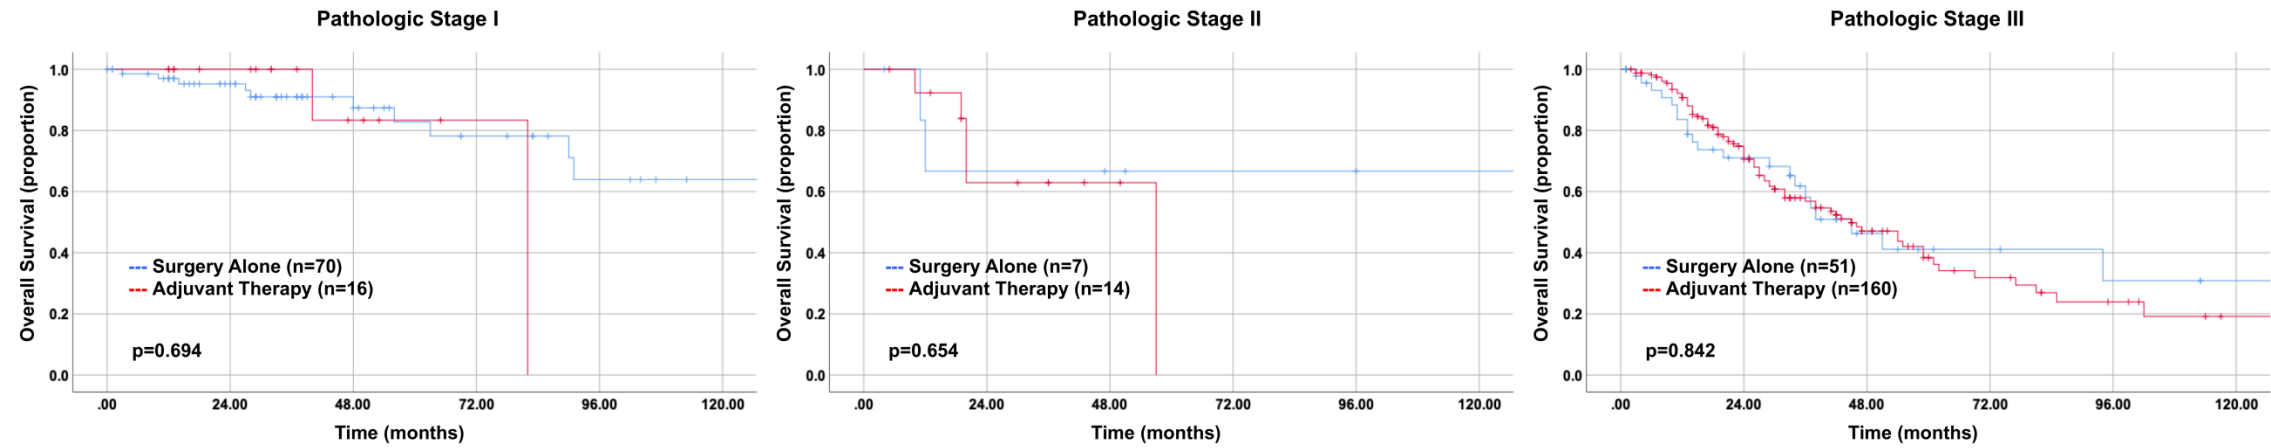

**eFigure 2.** Association of Adjuvant Chemoradiotherapy Relative to Surgery Alone (left; n=79) or Chemotherapy Alone (right; n=75) on Recurrence-Free Survival in the Propensity Score-Matched Cohort

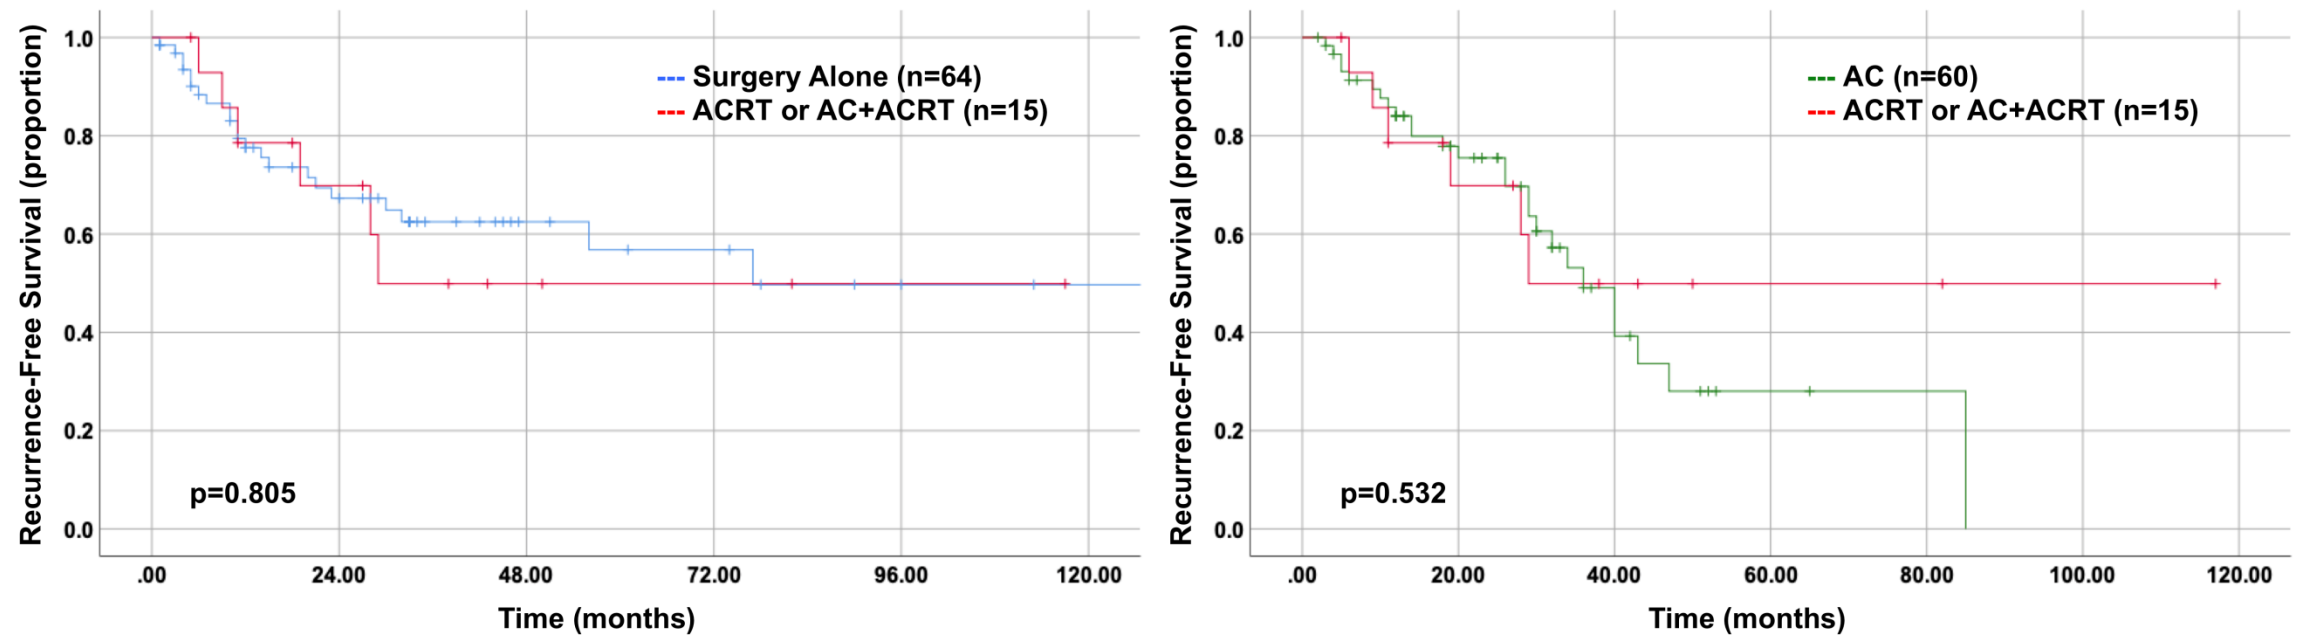

Supplement: jamasurg-154-706-s001.pdf [file jamasurg-154-706-s001.pdf]
